# Supplementary material for: Discriminating predation attempt outcomes during natural foraging using the post-buzz pause in the Japanese large-footed bat, Myotis macrodactylus
Source: Oxford University Press journal article supplement (doi:10.1242/jeb.243402), 2022-02-24
Supplement: jeb243402supp.pdf [file jeb243402supp.pdf]

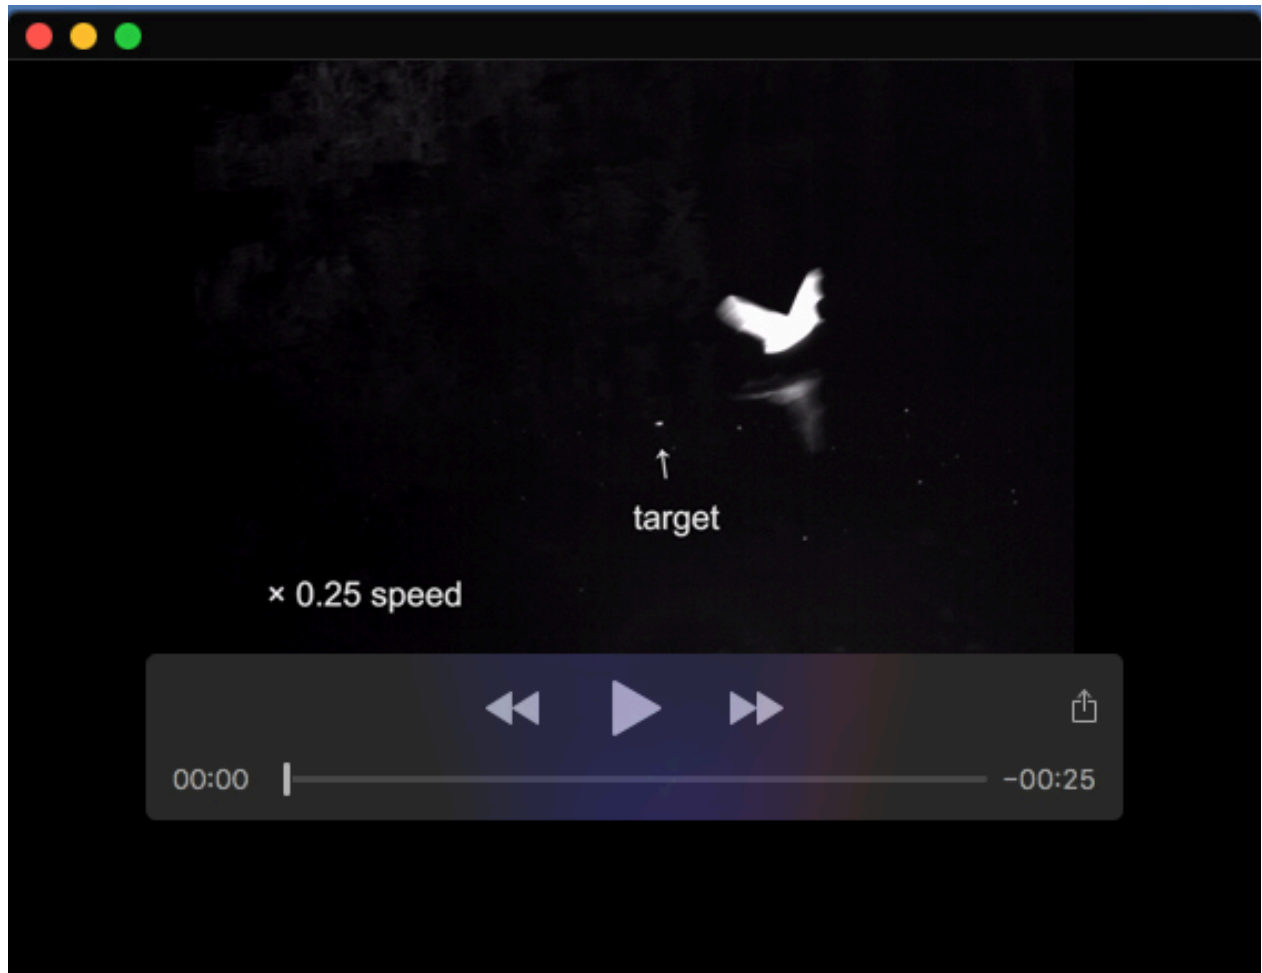

**Movie 1.** Natural foraging behavior of *Myotis macrodactylus* when prey capturing, prey dropping and failing to capture it.

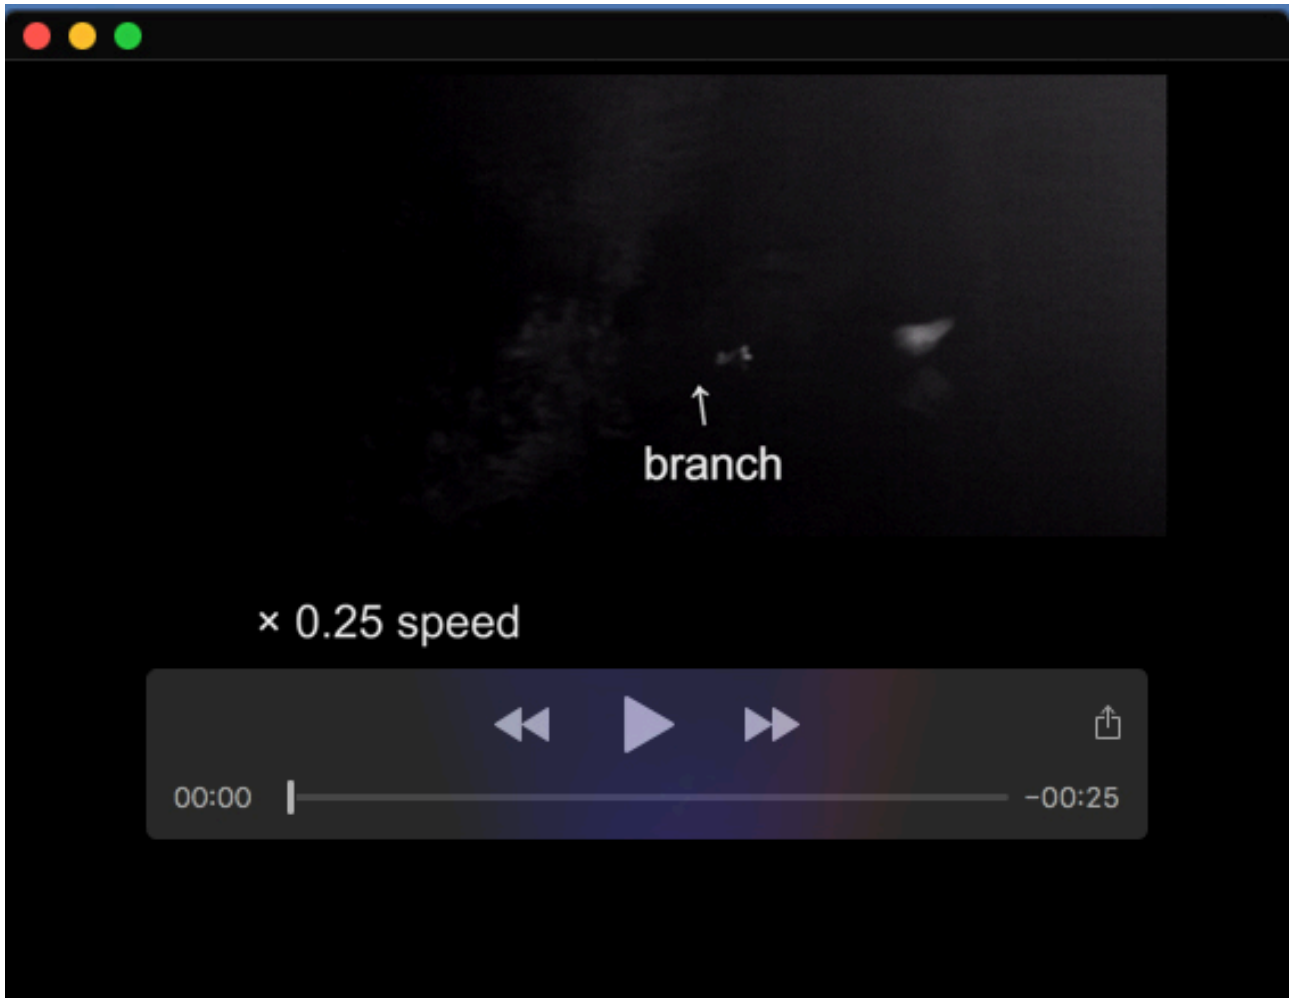

**Movie 2.** Natural foraging behavior of *Myotis macrodactylus* when attacking branch, repeating attacks and throwing away.
